1  
2  
3  
4  
5  
6  
7  
8  
9  
10  
11  
12  
13  
14  
15  
16  
17  
18  
19  
20  
21  
22  
23  
24  
25  
26  
27  
28  
29  
30  
31  
32  
33  
34  
35

# Topology and cooperative stability: the two master regulators of protein half-life in the cell

**Authors: Saurav Mallik<sup>1</sup>, and Sudip Kundu<sup>1,\*</sup>**

**Author affiliations:**

<sup>1</sup> Department of Biophysics, Molecular Biology and Bioinformatics, University of Calcutta, 92 Acharya Prafulla Chandra Road, Kolkata 700009, India.

\* To whom correspondence should be addressed. Email: [skmbg@caluniv.ac.in](mailto:skmbg@caluniv.ac.in).

**Full postal address of corresponding author:**

Department of Biophysics, Molecular Biology and Bioinformatics  
University of Calcutta  
92, Acharya Prafulla Chandra Road  
Kolkata  
India; Postal Code-700009  
Telephone: +91-033-2350-8386

## Abstract

In a quest for finding additional structural constraints, apart from disordered segments, regulating protein half-life in the cell (and during evolution), here we recognize and assess the influence of native topology of biological proteins and their sequestration into multimeric complexes. Native topology acts as a molecular marker of protein's mechanical resistance and consequently captures their half-life variations on genome-scale, irrespective of the enormous sequence, structural and functional diversity of the proteins. Cooperative stability (slower degradation upon sequestration into complexes) is a master regulator of oligomeric protein half-life that involves at least three mechanisms. (i) Association with multiple complexes results longer protein half-life; (ii) hierarchy of complex self-assembly involves short-living proteins binding late in the assembly order and (iii) binding with larger buried surface area leads to slower subunit dissociation and thereby longer half-life. Altered half-lives of paralog proteins refer to their structural divergence and oligomerization with non-identical set of complexes.

**Key words:** protein half-life, contact order, macromolecular complex, self-assembly pathway, buried surface area, paralogue

1 Cellular proteins are regularly degraded and replaced with newly synthesized copies, minimizing the  
2 accumulation of toxic damage and ensuring a functional proteome. An elegant balance between  
3 translation and degradation rates thus maintains protein concentration within the cell, assigning each  
4 protein a specific half-life<sup>1-4</sup>. A protein's life starts as its messenger RNA blueprint is translated into a  
5 chain of amino acid building blocks. This chain generally folds itself into a 3D molecule that then takes  
6 on functions such as enzymatic activity, binding specific ligands, helping to create cellular structures,  
7 assembling into macromolecular machines and transporting other proteins. Protein's life ends as a  
8 degradation machinery, such as the ubiquitin-proteasome system (UPS) in eukaryotes, proteolyzes it into  
9 multiple fragments<sup>4,5</sup>. The UPS includes two major enzymes. One is ubiquitin, that stochastically festoons  
10 substrate proteins with a molecular marker for degradation (a polyubiquitin tag). The other is proteasome,  
11 that (i) recognizes its substrates based on this tag, (ii) engages with an intrinsically disordered region  
12 (IDR) of the substrate, (iii) mechanically unfolds the protein by pulling the polypeptide chain from the  
13 engaged IDR into a degradation channel<sup>6</sup> where (iv) an ATP-driven proteolysis occurs<sup>5-7</sup> (Fig. 1a).

14 Experimental measurement of protein half-life in different organisms show a wide range of variation from  
15 minutes to days<sup>1-3</sup>, providing a platform based on which multiple biological questions can be addressed.  
16 Some studies have shown altered protein half-lives leading to abnormal development<sup>8</sup>, neurodegenerative  
17 diseases and cancer<sup>9</sup>. Accumulation of toxic damage in long-lived proteins is identified as a major inducer  
18 of ageing<sup>10</sup>. Other studies have looked for the factors that affect protein half-life in the cell<sup>11-19</sup>. Over the  
19 years, multiple factors have been identified—some tested only for specific proteins, some tested at  
20 genome-scale—to affect protein half-life in the cell.

21 The proteolytic site of proteasome is accessible only through a narrow degradation channel (10–15Å  
22 width, ~70Å length), through which only unstructured polypeptides can penetrate<sup>4,5</sup>. Consequently, on a  
23 genome-scale, proteins featuring long intrinsically disordered regions (IDRs) are more susceptible to  
24 degradation and they exhibit short half-lives<sup>12</sup>. Shorter half-life is also observed for proteins featuring  
25 IDRs with amino acid compositions permitting high-affinity proteasomal engagement<sup>11</sup>. To degrade  
26 globular proteins, the ATPase molecular motor of proteasome first sequentially unfolds them by pulling  
27 their polypeptide chain from the engaged IDR into the degradation channel<sup>4,13</sup>. This mechanical unfolding  
28 is resisted by the native molecular contacts stabilizing the globule<sup>14</sup> and only for a handful of proteins, it  
29 is shown that stronger resistance leads to slower degradation rates<sup>15,16</sup>. Protection from degradation is also  
30 achieved when proteins sequester into multicomponent complexes<sup>17-19</sup>. This effect is formally known as  
31 cooperative stability<sup>20</sup>, but neither its molecular basis is clearly understood, nor its impact on protein half-  
32 life is tested on a genomic scale.

33 Here, we exploit the experimental genome-scale half-life data of yeast proteins, wide-ranging information  
34 about their structural fold and 3D geometry, along with extensive biochemical characterization of the  
35 complexes they assemble into to develop a theory demonstrating how a wide spectrum of structural  
36 constraints of biological macromolecules regulates protein half-life in the cell. We begin by finding that  
37 native topology of monomeric globular proteins acts as a molecular marker of their mechanical resistance,  
38 and thus, affects half-life on a genomic-scale. For oligomeric proteins, the influence of topology is  
39 superseded by that of cooperative stability, that affects half-life in at least three mechanisms, (i)  
40 association with multiple complexes leads to longer half-lives of subunit proteins, (ii) hierarchy of  
41 complex self-assembly involves short-living proteins binding late in the assembly order and (iii) for small  
42 complexes, larger buried surface area, that generally reflects strong association and weak dissociation

1 constants, generally leads to longer half-lives. Finally, we confirm that diversification of native topology  
2 and promiscuous oligomerization are further exploited to alter protein half-life during evolution. Our  
3 work not only evaluates the independent and combined impacts of different structural constraints to  
4 regulate protein half-life, and places them into genomic context, but further deepens our understanding of  
5 the designing principles of biological macromolecules.

## 6 RESULTS

### 7 Prevalence of long-range contacts of globular proteins contribute to stronger mechanical 8 resistance and thereby longer half-life

9 Mechanical unfolding is a crucial step of globular protein degradation<sup>4,13</sup> and this phenomenon has  
10 received a great deal of scientific focus in the past decade, encouraging multiple experimental and  
11 simulation studies attempting to understand the molecular origin of protein's mechanical resistance (Data  
12 S1). An interesting comparison of ubiquitin and protein L (similar fold class) showed equivalent  
13 unfolding patterns at all chain pulling speeds, but the former having higher native long-range contacts  
14 (non-covalent contacts between residues far separated in primary chain) required higher peak unfolding  
15 force<sup>21</sup>. Starting from this point, we ask to what extent the prevalence of long-range native contacts of  
16 globular proteins (quantified as absolute contact order (*ACO*), the average primary chain separation of  
17 atomic contacts) affect their mechanical resistance. We perform three analyses. First, we estimate the  
18 correlation between native state *ACO* and the peak force required for mechanical unfolding (*Fm*) for two  
19 groups of proteins (Online Methods). The first group (G1) includes 16 proteins unfolded in Atomic Force  
20 Microscopy experiments, by pulling the polypeptide chains at 600 nm/s (11 proteins) and 300 nm/s (5  
21 proteins) speeds. The second group (G2) includes 27 proteins unfolded in all-atom computer simulations.  
22 Eleven proteins (G2A) were pulled from the N-terminal at  $5 \times 10^7$  nm/s speed (C-terminal fixed). Sixteen  
23 proteins (G2B) were pulled from N- and C-terminal separately at  $5 \times 10^6$  nm/s speed, keeping the other  
24 terminal free, thus allowing the substrate to rotate and adopt a less obstructive orientation for unfolding  
25 (as happens during degradation). Between *ACO* and *Fm*, we obtain surprisingly strong  $r_{ACO,Fm}^{600\text{nm/s}} = 0.95$  and  
26  $r_{ACO,Fm}^{300\text{nm/s}} = 0.93$  correlations in G1,  $r_{ACO,Fm}^{5 \times 10^7 \text{ nm/s}} = 0.78$  in G2A and  $r_{ACO,Fm|N}^{5 \times 10^6 \text{ nm/s}} = 0.74$ , and  $r_{ACO,Fm|C}^{5 \times 10^6 \text{ nm/s}} = 0.69$  in  
27 G2B for N- and C-terminal pulling respectively (**Fig. 1b-d**). Second, for three globular proteins with  
28 experimental data depicting alterations of mechanical resistance upon point-mutations (Online Methods),  
29 we confirm that an elevation/demotion of mechanical resistance is perpetually associated with alike  
30 changes of *ACO* (**Fig. 1e**, Data S1). Third, for some proteins it was demonstrated that their mechanical  
31 anisotropy (pulling from different termini requires different peak unfolding forces) determines the  
32 directional bias of degradation (the terminus that is intrinsically disordered / easier to mechanically unfold  
33 is preferred by the proteasome to initiate degradation)<sup>22</sup>. For three such cases (maltose-binding protein,  
34 apo-calmodulin and ovalbumin), where the two termini are located at two distinct structured domains, we  
35 make two crucial observations. (i) Proteasome prefers unwinding maltose binding protein from the C-  
36 terminal domain, that has lower *ACO* (and requires weaker unwinding force) compared to that of N-  
37 terminal domain. (ii) Proteasome has no directional preference to unwind apo-calmodulin and ovalbumin,  
38 and both of their N- and C-terminal domains exhibit nearly identical *ACO* (**Fig. 1f**). These three sets of  
39 analyses provide a statistical proof-of-concept that *ACO* acts as a molecular marker of protein's  
40 mechanical resistance, in a manner that higher *ACO* dictates higher mechanical resistance.

1 During an interesting experiment of titin degradation by ClpXP (bacterial/mitochondrial homolog of  
2 proteasome) Kenniston et al.<sup>15</sup> observed that folded titin molecules are processed at much slower rates  
3 (150 molecules/min) than unfolded ones (600 molecules/min). They concluded that proteasomal  
4 degradation being a stochastic process, each substrate has a fixed probability of denaturation during each  
5 enzymatic cycle. For substrates with stronger mechanical resistance (such as folded titin, compared to  
6 unfolded ones), this probability would be lower and denaturing most of the molecules in the population  
7 would require many ATP cycles<sup>15</sup>. Since higher *ACO* prompts higher mechanical resistance, for two  
8 proteins subjected to proteasomal degradation for the same time span, larger fraction of undegraded  
9 molecules is expected for the one with higher *ACO*. This notion is supported by the outcome of an  
10 experiment subjecting dihydrofolate reductase (from *Escherichia coli* and mouse) and ribonuclease  
11 barnase proteins to proteasomal degradation<sup>13</sup>. After 200 minutes of incubation, the percent of undegraded  
12 molecules of the three proteins exhibit a surprising  $-0.98$  correlation with their *ACO* values (**Fig. 1g**).  
13 These results encourage us to ask whether and how native topology influences protein half-lives in the  
14 cell. We start with 52 X-ray crystallographic structures ( $\leq 3$  Å resolution) of annotated yeast monomeric  
15 proteins (sequence coverage of crystal structure  $sc = 100\%$ ) and obtain a surprising  $r_{ACO, T_{1/2}}^{\text{mono}|100\%} = 0.72$  (  
16  $p < 10^{-17}$ ) correlation between *ACO* and  $\log T_{1/2}$  (**Fig. 2a**). For the 158 oligomeric protein structures as  
17 well, collected under the same criterion, we find a statistically significant, albeit much weaker correlation  
18 ( $r_{ACO, T_{1/2}}^{\text{oligo}|100\%} = 0.29, p < 10^{-3}$ , **Fig. 2b**). Even if we include crystal structures of 30 monomeric and 71  
19 oligomeric proteins with missing coordinates (signify flexible or disordered regions and crystal artifacts,  
20  $sc \geq 75\%$  is taken), significant correlations are obtained ( $r_{ACO, T_{1/2}}^{\text{mono}| \geq 75\%} = 0.70, p < 10^{-11}$ ;  $r_{ACO, T_{1/2}}^{\text{oligo}| \geq 75\%} = 0.24$ ,  
21  $p < 0.01$ , **Fig. 2c-d**).

22 Even after including all the  $\leq 3$  Å resolution structures with  $sc \geq 75\%$ , we are left with structures of only  
23 311 proteins, which although depicts a significant correlation ( $r_{ACO, T_{1/2}}^{\text{all}| \geq 75\%} = 0.36, p < 10^{-13}$ ), but is  
24 inadequate to infer a proteome-wide tendency ( $T_{1/2}$  known for 3274 proteins). Hence, we extend our  
25 structure dataset by including additional 799 modeled structures ( $sc \geq 75\%$ ) generated with reliable  
26 accuracy of fold assignment (Online Methods). For this set of total 1110 crystallographic and modeled  
27 structures, we obtain a striking  $r_{ACO, T_{1/2}} = 0.37$  correlation ( $p < 10^{-37}$ ) between  $\log T_{1/2}$  and *ACO*,  
28 demonstrating a proteome-wide tendency of native topology regulating protein half-lives (**Fig. 2e**).

29 Notably,  $r_{ACO, T_{1/2}}$  is stronger for monomers ( $r_{ACO, T_{1/2}}^{\text{mono}} = 0.74, p < 10^{-18}$ ), compared to both homo- (  
30  $r_{ACO, T_{1/2}}^{\text{homo}} = 0.26, p < 0.01$ ) and heteromers ( $r_{ACO, T_{1/2}}^{\text{hetero}} = 0.34, p < 10^{-13}$ ), for any  $sc \geq 75\%$ . Molecular basis  
31 of this weak correlation probably refers to at least two factors. First, the cooperative stability<sup>20</sup> of  
32 oligomeric proteins (escaping proteasomal degradation in complexed state<sup>17-19</sup>) is generally independent  
33 of, and often overpowers, the effect of *ACO*. Degradation of  $\beta$ -casein is an interesting example of this  
34 trend. Intrinsically disordered C-terminal domains of two  $\beta$ -casein molecules dock together to form a  
35 homodimer, forcing the proteasome to initiate degradation exclusively from the globular N-terminus<sup>22</sup>.  
36 Second, proteins associated with larger complexes (multiple subunits) are generally more flexible and  
37 experience higher structural rearrangements upon oligomerization<sup>23</sup>. Oligomeric proteins are observed to

1 degrade much faster at their monomeric states<sup>17-19</sup>, the *ACO* of which is not equal to the *ACO* we estimate  
2 from crystal structure data of yeast complexes. This may also weaken  $r_{ACO,T_{1/2}}$  correlations in oligomeric  
3 proteins. This notion is supported by the gradual reduction of  $r_{ACO,T_{1/2}}$  for larger homo- and heteromeric  
4 complexes (**Fig. 2f**).

5 Taken together, these data show that native topology acts as a master regulator of globular protein half-  
6 life, with indications that cooperative stability has some strong influence as well.

## 7 **Promiscuity of oligomerization results longer half-lives**

8 To assess the impact of cooperative stability on oligomeric protein half-life, first we develop a proteome-  
9 scale database of yeast macromolecular complexes. Starting from earlier published databases<sup>24,25</sup>, we  
10 continue a protein-by-protein manual curation of available experimental data (Online Methods), yielding  
11 a massive database of 805 heteromeric and 80 homomeric yeast complexes (Data S2). This database  
12 includes 2487 annotated yeast proteins. Complex subunits are classified into two classes, central  
13 (functional subunits of a matured complex, if different isoforms of the complex exist<sup>24,25</sup>, they are present  
14 in most isoforms) and attached (temporary attached particles such as assembly cofactors, chaperones and  
15 subunits present in some of the isoforms).

16 First, we test whether sequestration into multicomponent complexes has any measurable impact on  
17 protein half-life, apart from that of their *ACO*. We classify mono- and oligomeric proteins into distinct  
18 groups based on their *ACO*, and compare the respective half-life distributions. For similar ranges of *ACO*,  
19 oligomeric proteins exhibit significantly longer half-lives than monomeric proteins (**Fig. 3a**),  
20 demonstrating cooperative stability is another master regulator of protein half-life across the genome<sup>20</sup>.

21 How does cooperative stability relate to complex size and involvement of proteins in different  
22 complexes? Earlier we observed weaker  $r_{ACO,T_{1/2}}$  for complexes with multiple subunits. But surprisingly,  
23 participation in larger complexes is not associated with longer half-lives (Kruskal-Wallis (KW) test  
24  $p > 0.05$ , which extends Mann-Whitney-U test to  $\geq 2$  groups). Rather promiscuity of oligomerization  
25 appears to be a strong modulator of cooperative stability, in a matter that involvement in higher number of  
26 complexes as central particles is associated with longer half-life (KW  $p < 10^{-53}$ , **Fig. 3b**). Surprisingly,  
27 promiscuous oligomerization as attached particles have a mild effect in half-life elongation (KW  
28  $p > 0.05$ ). We perform two additional analyses to confirm this notion. First, we compare the half-life  
29 distributions of monomeric, central and attached proteins and observe significant differences in a manner  
30  $T_{1/2}^{\text{mono}} < T_{1/2}^{\text{attach}} < T_{1/2}^{\text{central}}$ , at similar ranges of *ACO* (**Fig. 3c**). Second, we classify the 2487 oligomeric  
31 proteins into three groups: proteins that participate in  $\geq 1$  complexes as central particles only (g1), those  
32 that contribute to  $\geq 1$  complexes as central and to  $\geq 1$  complexes as attached particles (g2) and those that  
33 participate in  $\geq 1$  complexes as attached particles only (g3) (**Fig. 3d-e**). Distributions of half-life differ  
34 significantly across these three groups in a manner  $T_{1/2}^{\text{g1}} > T_{1/2}^{\text{g2}} > T_{1/2}^{\text{g3}}$  (KW  $p < 10^{-41}$ , **Fig. 3f**). These results  
35 depict a proteome-wide tendency that central particles accomplish higher cooperative stability than  
36 attached particles upon complex formation.

## 37 **Cooperative stability of central subunits refers to burial of their short IDRs**



1 Why do central particles achieve higher cooperative stability than attached particles upon  
2 oligomerization? We first check if this is because central particles exhibit higher  $ACO$  than attached  
3 particles. Notably,  $ACO$  distributions across g1, g2 and g3 do not differ significantly (KW  $p = 0.09$ , **Fig.**  
4 **4a**). It is already known that presence of sufficiently long terminal ( $\sim 30$  residues) and internal ( $\sim 40$   
5 residues) IDRs, that can engage with proteasome, is associated with significantly shorter half-lives<sup>12</sup>.  
6 Interestingly, a comparison of IDRs across g1, g2 and g3 reveals three key aspects. (i) Lengths of both  
7 terminal and internal IDRs ( $L_{IDR}$ ) differ significantly across the three groups in a manner  
8  $L_{IDR}^{g1} < L_{IDR}^{g2} < L_{IDR}^{g3}$  (KW  $p < 10^{-3}$ , **Fig. 4b-d**). (ii) Central and attached proteins tend to have terminal  
9 IDRs shorter and longer, respectively, than the cutoff required for direct proteasomal engagement; (iii)  
10 both central and attached proteins exhibit internal disordered regions susceptible to direct proteasomal  
11 engagement (**Fig. 4b-d**). Since IDRs often get buried upon complex formation<sup>26</sup>, for crystal structures of  
12 229 oligomeric proteins, we compare the percent of buried residues at terminal and internal IDRs ( $B_{IDR}$ )  
13 upon oligomerization across the three groups. We find a statistically significant trend  $B_{IDR}^{g1} > B_{IDR}^{g2} > B_{IDR}^{g3}$   
14 for internal IDRs only (KW  $p < 0.01$ , **Fig. 4e**).

15 These two results suggest that higher cooperative stability of central subunits refer to their (i) significantly  
16 shorter terminal IDRs and higher burial tendency of internal IDRs upon complex formation, compared to  
17 those of attached particles. These attributes make central particles more likely candidates of escaping  
18 proteasomal engagement in the complexed state, compared to attached particles. Association with  
19 multiple complexes as central particles, is likely to elevate this probability of escaping degradation,  
20 explaining why promiscuous oligomerization leads to longer half-lives of central subunits. Cooperative  
21 stability thus acts a versatile and generic biophysical constraint to maintain oligomeric protein half-life  
22 (therefore abundance) according to their requirement in cellular machines.

### 23 **Complex self-assembly involve subunits with shorter half-lives binding late in the temporal order**

24 The constituent subunits of macromolecular complexes follow evolutionarily conserved self-assembly  
25 pathways to organize themselves into complex functional machines<sup>27-29</sup>. A temporal order of subunit  
26 binding dictates that proteins binding early in the assembly order, remain in oligomeric state longer than  
27 those that bind late. Depending on the size of the complex, availability of subunits and cofactors, and  
28 efficiency of structural rearrangements to escape kinetic traps, self-assembly processes can continue from  
29 microseconds to several minutes<sup>30,31</sup>. This suggests that at least for large complexes, the temporal delay of  
30 subunit association can be long enough for proteasomal degradation rates to matter, resulting shorter  
31 subunit half-lives downward the assembly hierarchy. To test this, by an extensive literature search we  
32 collect the assembly hierarchy of 31 yeast complexes (Data S3) indispensable to central cellular processes  
33 such as replication, transcription, translation, cell cycle and transport. For distinct stages of subunit  
34 binding, we average the half-lives of respective subunits to estimate Spearman rank correlation ( $rc$ ) with  
35 the temporal order. Consistent with our hypothesis, for 17 complexes with  $\geq 3$  stages of subunit binding  
36 (including ribosome, DNA and RNA Polymerases, kinetochore) we find  $rc = -1$  ( $p < 0.05$ , **Fig. 5a**). For  
37 18 additional complexes with only 2 stages of subunit binding (including nucleosome, DNA repair  
38 complex, mRNA decapping complex, Mitotic Checkpoint complex) half-life distributions also follow the  
39 same trend. 20S core particle of proteasome is the only exception, and being exception probably refers to  
40 significantly lower (MWU  $p < 0.05$ )  $ACO$  of  $\alpha$ -subunits (21.8) that assemble prior to  $\beta$ -subunits (26.2).

## 1 Oligomerization with burial of higher proportion of protein surface area leads to longer half-life

2 Earlier studies on nonredundant heteromeric complexes with experimental binding kinetics data depicted  
3 positive and negative correlations of buried surface area (*BSA*) with association<sup>32</sup> and dissociation<sup>33</sup> rates.  
4 In these studies, a 500 Å<sup>2</sup> to 3500 Å<sup>2</sup> increment of *BSA* caused 10<sup>10</sup>-fold elevation of dissociation  
5 constant, that is expected to elevate the mean lifetime of a complex from milliseconds to hours<sup>34</sup>. These  
6 results suggest that for small dimeric complexes, higher *BSA* of the two subunits may lead to longer half-  
7 lives of the individual subunits. In other words, a positive correlation between *BSA* and  $T_{1/2}$  can be  
8 expected. Estimating the *BSA* from crystal structure data (Online Methods), we indeed find this positive  
9 correlation for homo and heterodimers ( $r_{BSA, \log T_{1/2}} = 0.23$ ,  $p < 0.01$ , **Fig. 5b**). This relationship applies to  
10 homomers up to dodecamers but not to heteromers any larger than dimers, probably because the temporal  
11 order of homomer dissociation largely follows the decreasing order of *BSA*<sup>28</sup>, which is not necessarily true  
12 for heteromeric complexes<sup>29</sup>. Use of percent of accessible surface area (*ASA*) buried (  
13 %*ASAb* =  $BSA \times 100 / ASA$ ) instead of *BSA*, elevates this correlation to  $r_{\%ASAb, \log T_{1/2}}^{\text{homo}} = 0.54$  ( $p < 10^{-6}$ ) for  
14 homo- and  $r_{\%ASAb, \log T_{1/2}}^{\text{hetero}} = 0.51$  ( $p < 10^{-4}$ ) for heterodimers (**Fig. 5b**).

## 15 Divergence of topology and of oligomerization promiscuity alters protein half-life in evolution

16 Structural determinants of protein half-life that we have analyzed so far are irrespective of the architecture  
17 of degradation machinery present in the cellular environment, which raises the question whether such  
18 attributes are exploited to alter protein half-life during evolution. Paralog protein pairs<sup>12</sup> (arose from gene  
19 duplication) provide an excellent platform for such comparison between evolutionarily related proteins  
20 evolving under similar conditions. We observe a surprising result that divergence of native topology  
21 following gene duplication leads to altered half-lives of paralog pairs (**Fig. 5c**).

22 Gene duplication is often associated with loss and emergence of novel functions<sup>35,36</sup>. We identify a  
23 molecular signature of such functional diversification for 721 out of 1632 pre-identified yeast paralog  
24 pairs<sup>12</sup> in terms of their oligomerization with non-identical sets (overlapping/nonoverlapping) of  
25 macromolecular complexes, which again, efficiently captures altered half-lives of these paralog pairs  
26 (**Fig. 5c**). Oligomerization with non-identical sets of complexes is associated with average ~194 min  
27 variation of half-life, which is substantial, given ~140 min average yeast doubling time during  
28 exponential growth<sup>37</sup>. Thus, altered half-life due to oligomerization with non-identical sets of  
29 macromolecular complexes could have a significant impact on the duration for which a protein can impart  
30 its function and thus affect cellular behavior.

## 31 Discussion

32 How does the intrinsic structural features affect the lifetime of a protein? For over a decade this question  
33 has been of outstanding interest in molecular biology. The mechanistic details of proteasomal function led  
34 to the recognition of two factors to influence protein lifetime *in vivo*. Those include the presence of  
35 structural motifs promoting ubiquitinylation<sup>38</sup> and the presence of IDRs of sufficient size amenable to  
36 proteasomal engagement<sup>12</sup>. Our work extends the realm of these intrinsic structural features by  
37 distinguishing native topology of biological proteins and their potential to oligomerize into  
38 multicomponent complexes as master regulators of protein half-life in the cell. It is remarkable how

1 simple geometrical considerations and oligomerization information appear to explain much of the  
2 differences in protein half-life over an entire genome, that includes nearly a thousand-fold variation of  
3 half-lives, and an enormous diversity of sequence, structure and function of the proteins compared.

4 The topological complexity of the protein fold (represented by *ACO*) plays a crucial role in determining  
5 the kinetics of protein folding<sup>39</sup>. We represent the first quantitative sketch of how the same factor acts as a  
6 molecular marker of their mechanical resistance and thereby captures variations of protein half-life.  
7 Further analysis shows that although overall degree of disorder of globular proteins also regulates their  
8 mechanical resistance, *ACO* plays the major deterministic role (**Text S1**). The role of long-range contacts  
9 in determining protein's mechanical resistance was first revealed by comparing the unfolding patterns of  
10 ubiquitin and protein L, those feature similar fold class, but the former requires ~70 pN higher force to  
11 unwind<sup>21</sup>. The terminal segments, by which the two proteins were pulled, make similar number of  
12 contacts with the hydrophobic core of both proteins, but the number of long-range contacts made between  
13 terminal regions of protein L and its hydrophobic core are significantly fewer than those for ubiquitin.  
14 This suggested that protein's mechanical stability emerges from how the terminal—that is being pulled—  
15 is globally and cooperatively stabilized across the structure<sup>21</sup>. We generalize this concept in terms of a  
16 surprising correlation between mechanical resistance and *ACO*, that is further informative to capture half-  
17 life variations of thousands of proteins across yeast genome. The relationship between *ACO* and  
18 mechanical resistance may be the missing link to rationalize a wide range of observations regarding force-  
19 induced protein remodeling. The observation that native state *ACO* of  $\beta$ -sheet proteins is significantly  
20 higher than that of  $\alpha$ -helix proteins of similar lengths (**Text S1**), indicates why the latter is mechanically  
21 weaker than the former<sup>40,41</sup>. Variation of *ACO* in different domains of multidomain proteins reflects their  
22 mechanical anisotropy (require unequal forces to unwind), and in turn, their directional preference to  
23 proteasomal degradation<sup>22</sup>.

24 For oligomeric proteins, sequestration into multimeric complexes itself warrants escaping proteasomal  
25 degradation to some extent<sup>17-20</sup>, resulting much weaker correlations between half-life and native topology.  
26 This correlation is even more weaker for proteins that remain disordered in monomeric state (**Text S1**).  
27 The role of cooperative stability to elongate protein lifetime in the complexed state was extrapolated  
28 multiple times in the past<sup>17-20</sup>, but this notion receives its first genome-scale assessment only in this study.  
29 Results depict that the impact of cooperative stability is generic but versatile. The generic nature is likely  
30 inherent to the fact that sequestration into complexes buries the disordered segments amenable to  
31 proteasomal engagement<sup>26</sup>, making oligomers more likely candidates of escaping proteasomal  
32 degradation compared to monomers having similar *ACO*. And the versatility is likely achieved by varying  
33 the temporal window of proteins being in the oligomeric state. This is attained by at least four  
34 mechanisms, (i) promiscuity of oligomerization (elevates the probability of finding the protein in  
35 oligomeric state), (ii) pervasive or temporary attachment with the complexes (central particles are  
36 permanent members of the complex and have longer half-lives than attached particles that are temporary  
37 members), (iii) temporal order of binding in the self-assembly pathway (early binding proteins remain in  
38 oligomeric state longer than late binding proteins) and (v) surface area buried upon binding (larger  
39 surface area ensures slower dissociation and hence longer half-life). This versatility of cooperative  
40 stability is believed to be important for the robustness and evolvability of genetic circuits<sup>20</sup>. These results  
41 further suggest that complex lifetime should have a strong influence on half-lives of its constituent  
42 subunits, challenging protein biochemists to assess this concept to direct experimental testing.



1 We observe that structural divergence upon gene duplication and association with differential set of  
2 macromolecular complexes influence half-lives of paralogue protein pairs. It also suggests a mechanism  
3 for divergence of half-life among orthologous proteins between species. Earlier, evolutionary variations  
4 leading to alteration of disordered regions was suggested to provide a simple evolutionary mechanism for  
5 fine-tuning protein lifetime according to regulatory sub-functionalization of paralogous proteins<sup>12</sup>. Our  
6 results suggest that fine-tuning protein half-life can also be achieved by harboring genetic variants that  
7 encode proteins with altered structural geometry compared to the wild-types<sup>42</sup>. Such evolutionary  
8 innovations are believed to manipulate regulatory schemes in genetic circuits to foster evolvability<sup>43</sup>.

9 In summary, our results reflect a complex interplay among versatile biophysical constraints associated  
10 with native topology, assembly, and oligomerization of biological macromolecules maintaining protein  
11 half-life in the cell. Native topology and oligomerization of proteins into multimeric complexes are  
12 independent of the architecture of the degradation machinery, and therefore, these factors are expected to  
13 be in effect equivalently in all living organisms.

## 14 **Acknowledgements**

15 The authors sincerely acknowledge Vladimir Uversky (University of South Florida) for his critical  
16 reading and many useful suggestions. During the analysis phase of the work, we also acknowledge the  
17 constructive discussions with Tanaya Ray (Harischandra Research Institute).

## 18 **Author contributions**

19 S.M. and S.K. conceptualized and designed research, S.M. collected and curated data and performed all  
20 the analyses, S.M., and S.K. discussed and interpreted the results and wrote the manuscript.

## 21 **Competing financial interests**

22 The authors declare no competing financial interest exists.

## 23 **Supplementary data**

24 Protein Mechanical Resistance Data used in this study: Data S1, Yeast Complexome: Data S2, Complex  
25 assembly pathway database: Data S3, Paralogue Data: Data S4

## 26 **References**

- 27 1. Belle, A., Tanay, A., Bitincka, L., Shamir, R. & O'Shea, E.K. Quantification of protein half-lives in the budding yeast  
28 proteome. *Proc. Natl. Acad. Sci. USA* 103, 13004-13009 (2006).
- 29 2. Cambridge, S.B., et al. Systems-wide proteomic analysis in mammalian cells reveals conserved, functional protein  
30 turnover. *J. Proteome Res.* 10, 5275-5284 (2011).
- 31 3. Price, J.C., Guan, S., Burlingame, A., Prusiner, S.B. & Ghaemmaghami, S. Analysis of proteome dynamics in the  
32 mouse brain. *Proc. Natl. Acad. Sci. USA* 107, 14508-14513 (2010).
- 33 4. Bhattacharyya, S., Yu, H., Mim, C. & Matouschek, A. Regulated protein turnover: snapshots of the proteasome in  
34 action. *Nat Rev Mol Cell Biol.* 15, 122-133 (2014).
- 35 5. Finley, D. Recognition and processing of ubiquitin-protein conjugates by the proteasome. *Annu Rev Biochem.* 78, 477-  
36 513 (2009).
- 37 6. Prakash, S. & Matouschek, A. Protein unfolding in the cell. *Trends Biochem Sci.* 29, 593-600 (2004).
- 38 7. Thrower, J.S., Hoffman, L., Rechsteiner, M. & Pickart, C.M. Recognition of the polyubiquitin proteolytic signal.  
39 *EMBO J.* 19, 94-102 (2000).

- 1 8. Hirata, H., et al. Instability of Hes7 protein is crucial for the somite segmentation clock. *Nat Genet.* 36, 750-754 (2004).
- 2 9. Yang, C., et al. Missense mutations in the human SDHB gene increase protein degradation without altering intrinsic
- 3 enzymatic function. *The FASEB J.* 26, 4506-4516 (2012).
- 4 10. Toyama, B.H. & Hetzer, M.W. Protein homeostasis: live long, won't prosper. *Nat. Rev. Mol. Cell. Biol.* 14, 55–61
- 5 (2013).
- 6 11. Fishbain, S., et al. Sequence composition of disordered regions fine-tunes protein half-life. *Nat Struct Mol Biol.* 22,
- 7 214-221 (2015).
- 8 12. van der Lee, R. et al. Intrinsically disordered segments affect protein half-life in the cell and during evolution. *Cell Rep.*
- 9 8, 1832-1844 (2014).
- 10 13. Lee, C., Schwartz, M.P., Prakash, S., Iwakura, M. & Matouschek, A. ATP-dependent proteases degrade their substrates
- 11 by processively unraveling them from the degradation signal. *Mol Cell.* 7, 627-637 (2001).
- 12 14. Schwaiger, I., Kardinal, A., Schleicher, M., Noegel, A.A. & Rief, M. A mechanical unfolding intermediate in an actin-
- 13 crosslinking protein. *Nat Struct Mol Biol.* 11, 81-85 (2004).
- 14 15. Kenniston, J.A., Baker, T.A., Fernandez, J.M. & Sauer, R.T. Linkage between ATP consumption and mechanical
- 15 unfolding during the protein processing reactions of an AAA+ degradation machine. *Cell* 114, 511-520 (2003).
- 16 16. Henderson, A., Eralles, J., Hoyt, M.A. & Coffino, P. Dependence of proteasome processing rate on substrate unfolding.
- 17 *J. Biol. Chem.* 286, 17495-17502 (2011).
- 18 17. Johnson, P.R., Swanson, R., Rakhilina, L. & Hochstrasser, M. Degradation signal masking by heterodimerization of
- 19 MATA2 and MATA1 blocks their mutual destruction by the ubiquitin-proteasome pathway. *Cell* 94, 217-227 (1998).
- 20 18. Xu, Y., et al. Loss of protein association causes cardiolipin degradation in Barth syndrome. *Nat. Chem. Biol.* 12, 641-
- 21 647 (2006).
- 22 19. Kang, J.Q., Shen, W., Lee, M., Gallagher, M.J. & Macdonald, R.L. Slow degradation and aggregation in vitro of
- 23 mutant GABAA receptor gamma2(Q351X) subunits associated with epilepsy. *J Neurosci.* 30, 13895-13905 (2010).
- 24 20. Buchler, N.E., Gerland, U. & Hwa, T. Nonlinear protein degradation and the function of genetic circuits. *Proc. Natl.*
- 25 *Acad. Sci. USA* 102, 9559-9564 (2005).
- 26 21. Brockwell, D.J. et al. Mechanically unfolding the small, topologically simple protein L. *Biophys J.* 89, 506-519 (2005).
- 27 22. Berko, D., et al. The direction of protein entry into the proteasome determines the variety of products and depends on
- 28 the force needed to unfold its two termini. *Mol. Cell* 48, 601-611 (2012).
- 29 23. Marsh, J.A. & Teichmann, S.A. Protein flexibility facilitates quaternary structure assembly and evolution. *PLoS Biol.*
- 30 12, e1001870 (2014).
- 31 24. Gavin, A.C., et al. Proteome survey reveals modularity of the yeast cell machinery. *Nature* 440, 631-636 (2006).
- 32 25. Orchard, S., et al. The MIntAct project—IntAct as a common curation platform for 11 molecular interaction databases.
- 33 *Nucleic Acids Res.* 42, D358-D363 (2013).
- 34 26. Fong, J.H., et al. Intrinsic disorder in protein interactions: insights from a comprehensive structural analysis. *PLoS*
- 35 *Comput Biol.* 5, e1000316 (2009).
- 36 27. Marsh, J.A., et al. Protein complexes are under evolutionary selection to assemble via ordered pathways. *Cell* 153, 461-
- 37 470 (2013).
- 38 28. Levy, E.D., Erba, E.B., Robinson, C.V. and Teichmann, S.A. Assembly reflects evolution of protein complexes. *Nature*
- 39 453, 1262-1265 (2008).
- 40 29. Mallik, S. & Kundu, S. Coevolutionary constraints in the sequence-space of macromolecular complexes reflect their
- 41 self-assembly pathways. *Proteins* 85, 1183–1189 (2017).
- 42 30. Gilson, M.K., et al. BindingDB in 2015: A public database for medicinal chemistry, computational chemistry and
- 43 systems pharmacology. *Nucleic Acids Res.* 44, D1045-D1053 (2016).
- 44 31. Mulder, A.M., et al. Visualizing ribosome biogenesis: parallel assembly pathways for the 30S subunit. *Science*, 330,
- 45 673-677 (2010).
- 46 32. Kastritis, P.L., et al. A structure-based benchmark for protein–protein binding affinity. *Protein Sci.* 20, 482-491 (2011).
- 47 33. Chen, J., Sawyer, N. & Regan, L. Protein–protein interactions: general trends in the relationship between binding
- 48 affinity and interfacial buried surface area. *Protein Sci.* 22, 510-515 (2013).
- 49 34. Corzo, J. Time, the forgotten dimension of ligand binding teaching. *Biochem. Mol. Biol. Educ.* 34, 413-416 (2006).
- 50 35. Hughes, A.L. Gene duplication and the origin of novel proteins. *Proc. Natl. Acad. Sci. USA* 102, 8791-8792 (2005).
- 51 36. Wagner, A. The fate of duplicated genes: loss or new function? *Bioessays* 20, 785-788 (1998).
- 52 37. Sherman, F. Getting started with yeast. *Methods Enzymol.* 350, 3-41 (2002).
- 53 38. Komander, D., Clague, M.J. & Urbé, S. Breaking the chains: structure and function of the deubiquitinases. *Nat. Rev.*
- 54 *Mol. Cell Biol.* 10, 550-563 (2009).

- 1 39. Dinner, A.R. & Karplus, M. The roles of stability and contact order in determining protein folding rates. *Nat. Struct.*  
2 *Biol.* 8, 21-22 (2001).
- 3 40. Chen, Y., Radford, S.E. & Brockwell, D.J. Force-induced remodelling of proteins and their complexes. *Curr Opin*  
4 *Struct Biol.* 30, 89-99 (2015).
- 5 41. Hoffmann, T., Tych, K.M., Hughes, M.L., Brockwell, D.J. & Dougan, L. Towards design principles for determining  
6 the mechanical stability of proteins. *Phys. Chem. Chem. Phys.* 15, 15767-15780 (2013).
- 7 42. Sikosek, T. & Chan, H.S. Biophysics of protein evolution and evolutionary protein biophysics. *J R Soc Interface* 11,  
8 20140419 (2014).
- 9 43. Wagner A. *Robustness and evolvability in living systems*. Princeton University Press, Princeton, N.J. (2005).

10  
11  
12  
13  
14  
15  
16  
17  
18  
19  
20  
21  
22  
23  
24  
25  
26  
27  
28  
29  
30  
31  
32  
33  
34  
35  
36  
37  
38  
39  
40  
41  
42  
43  
44  
45

1  
2  
3  
4  
5  
6  
7  
8  
9  
10  
11  
12  
13  
14  
15  
16  
17  
18  
19  
20  
21  
22  
23  
24  
25  
26  
27

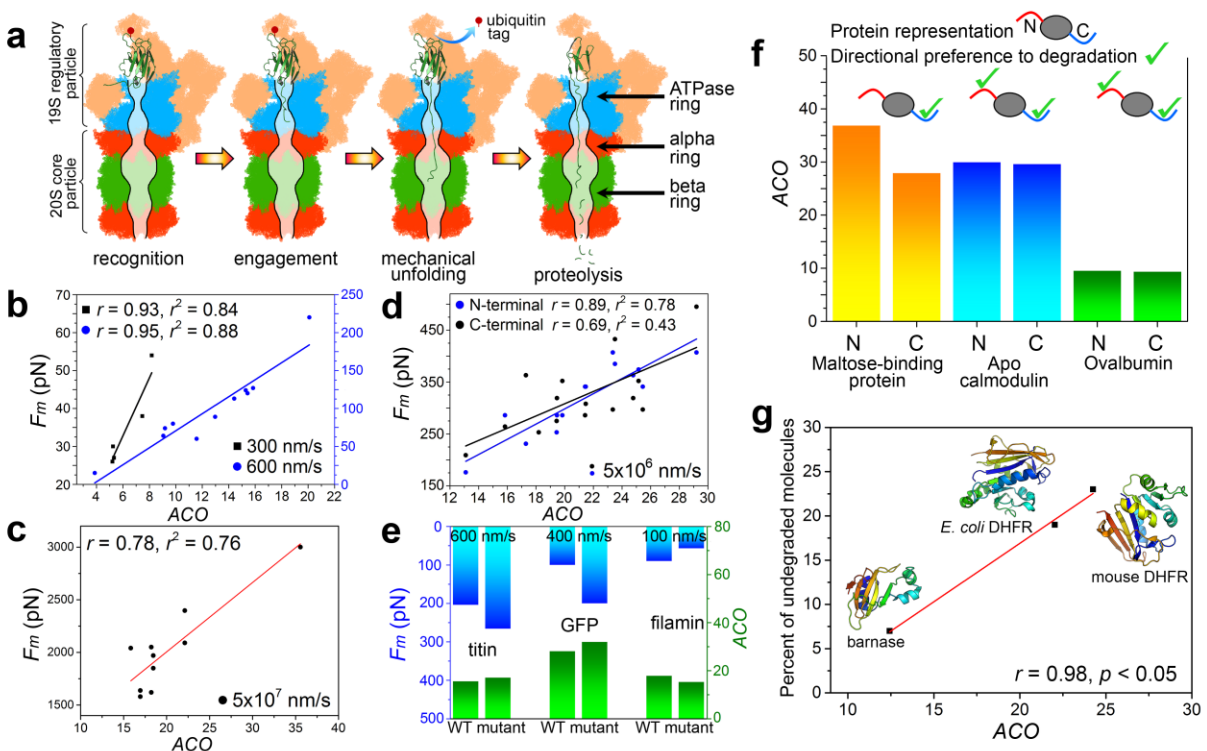

**Figure 1** Native topology acts as a marker of protein's mechanical resistance. **(a)** A schematic representation of proteasome function. **(b)** The peak unfolding forces estimated for pulling the termini of 11 globular proteins at 600 nm/s and of 5 proteins at 300 nm/s speeds (G1 set), in Atomic Force Microscopy experiments, are plotted against their native ACO. **(c)** The peak unfolding forces estimated in all-atom computer simulation to unwind 11 proteins from N-terminal at  $5 \times 10^7$  nm/s speed are plotted against their native ACO (G2A set). Solid lines indicate linear regressions. **(d)** The peak unfolding forces estimated in all-atom computer simulation to unwind 16 proteins from N- and C-terminal separately at  $5 \times 10^6$  nm/s speeds are plotted against their native ACO (G2B set). **(e)** For titin, green fluorescent protein and filamin, elevation/demotion of mechanical resistance upon point-mutations is associated with alike changes of ACO. The three proteins are unfolded at three different speeds, suggesting this pattern is irrespective of chain-pulling speeds. **(f)** Proteasome prefers to unwind globular proteins by using the terminal as initiation site that requires minimum peak unwinding force. For three such experimentally verified cases, where the two termini are located at two distinct structured domains, ACO associated with the two domains are plotted, along with highlighting the directional preference of proteasome. **(g)** The percent of undegraded molecules of barnase and dihydrofolate reductase (DHFR, from *Escherichia coli* and mouse) after 200 minutes of incubation with the proteasome are plotted against their ACO.

1  
2  
3  
4  
5  
6  
7  
8  
9  
10  
11  
12  
13  
14  
15  
16  
17  
18  
19  
20  
21  
22  
23  
24  
25  
26  
27  
28

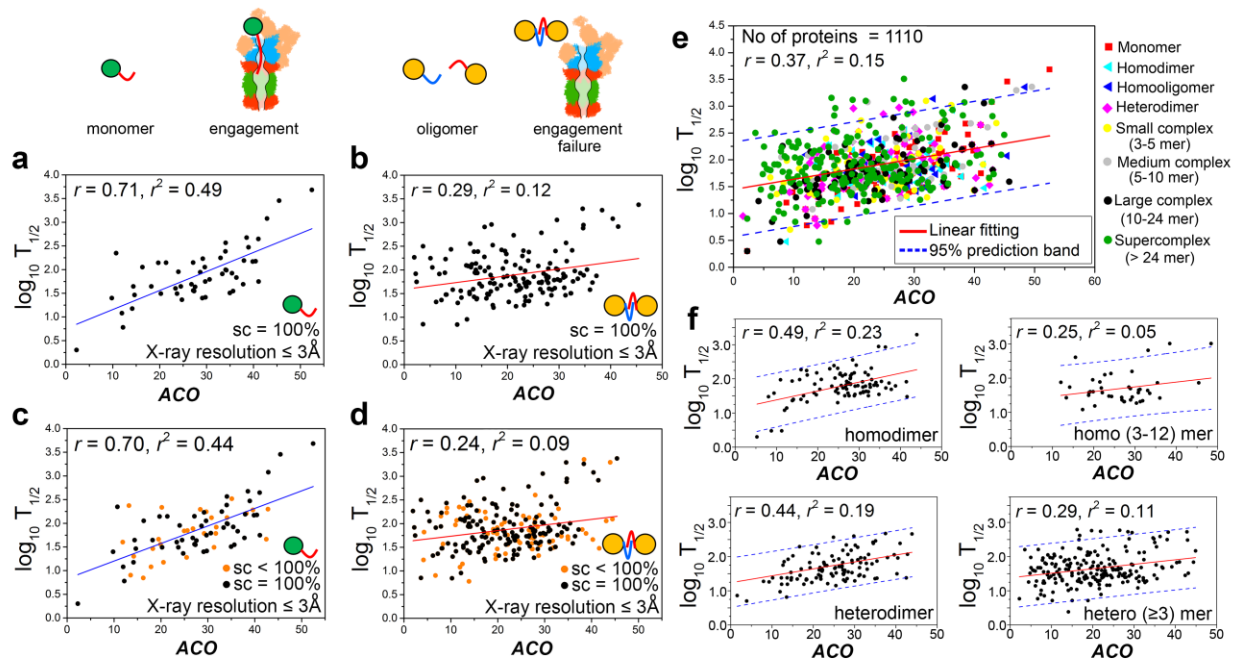

**Figure 2** Native topology captures half-life variations of globular proteins on a genomic scale. **(a)** For monomeric and **(b)** oligomeric proteins with crystal structures covering entire protein lengths, logarithms of half-life values are plotted against native state ACO. Solid lines signify linear regression. **(c)** For monomeric and **(d)** oligomeric proteins with crystal structures covering  $\geq 75\%$  of protein lengths, logarithms of half-life values are plotted against native state ACO. **(e)** For crystal and modeled structures of 1110 yeast proteins, their logarithmic half-lives are plotted against their native state ACO, followed by a linear regression. **(f)** Four plots depict that for larger complexes, the correlation between logarithmic half-life and ACO drops. The top panels include the plots for homodimers and homooligomers, the bottom panels include plots for heterodimers and heterooligomers.



1  
2  
3

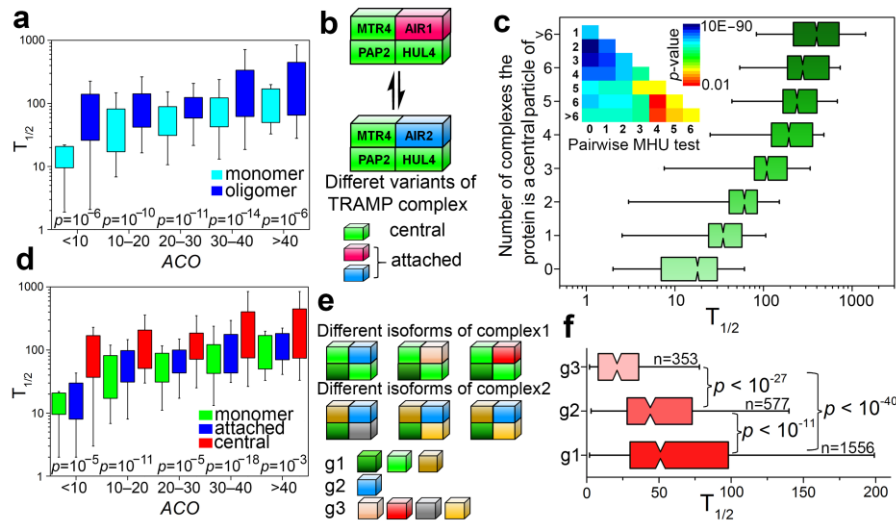

4  
5  
6  
7  
8  
9  
10  
11  
12  
13  
14  
15

**Figure 3** Cooperative stability is a master regulator of oligomeric protein half-life. **(a)** At similar ranges of native state ACO, half-life distributions of mono- and oligomeric proteins are compared using pairwise Mann-Whitney U-tests. **(b)** An example of different isoforms of TRAMP complex and definitions of central and attached subunits. **(c)** Comparing half-life distributions of proteins associated with different number of complexes (as central subunits) using pairwise Mann-Whitney U-tests. **(d)** At similar ranges of native state ACO, half-life distributions of monomeric, central and attached proteins are compared using pairwise Mann-Whitney U-tests. **(e)** A schematic representation of classifying oligomeric proteins into g1 (participate in  $\geq 1$  complexes as central particles only), g2 (contribute to  $\geq 1$  complexes as central and to  $\geq 1$  complexes as attached particles) and g3 (participate in  $\geq 1$  complexes as attached particles only) groups. **(f)** Comparing half-life distributions of proteins across g1, g2 and g3 using pairwise Mann-Whitney U-tests.

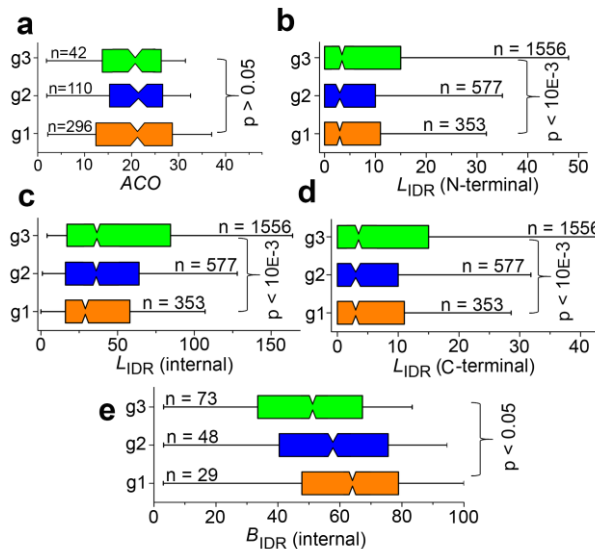

16  
17  
18  
19  
20

**Figure 4** Differential cooperative stabilities of core and attached proteins. **(a)** Comparing ACO distributions of proteins across g1, g2 and g3 groups using permutation Kruskal-Wallis test. The three distributions do not differ significantly. Comparing the lengths of **(b)** N-terminal, **(c)** internal and **(d)** C-terminal intrinsically disordered regions of proteins across g1, g2 and g3 groups using permutation Kruskal-Wallis test. The length cutoff for terminal and internal

1 disordered regions for direct proteasomal engagement is 30 and 40 amino acids (ref. 12). (e) Comparing the percent  
 2 of internal disordered region burial proteins across g1, g2 an g3 groups using permutation Kruskal-Wallis test.  
 3

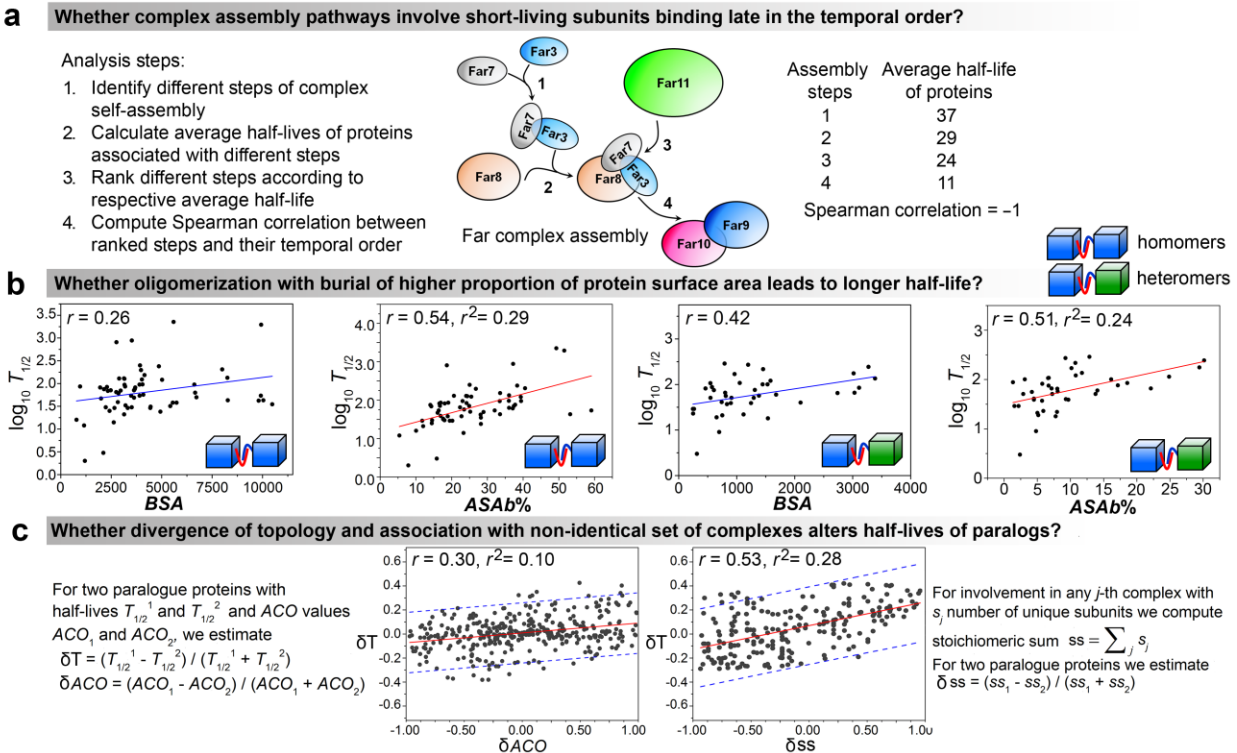

4  
 5 **Figure 5** Assembly hierarchy and subunit buried surface area as regulators of protein half-life. (a) The computational  
 6 pipeline to investigate whether and how assembly pathways of macromolecular complexes influence half-lives of  
 7 different subunits binding in different temporal order. (b) Buried surface area (BSA) and percent of accessible surface  
 8 area buried (%ASAb) of homomeric and heterodimeric complex subunits are correlated with subunit half-lives. Solid  
 9 lines signify linear regressions in each case. (c) To investigate how structural (differential ACO) and functional  
 10 divergence (association with non-identical sets of complexes), we compute three parameters shown in the figure:  $\delta T$ ,  
 11  $\delta ACO$  and  $\delta ss$ . We find the linear regressions between  $\delta T$  and  $\delta ACO$  and that between  $\delta T$ ,  $\delta ss$ . Solid lines signify  
 12 linear regressions, dotted blue lines represent 95% prediction bands.

13  
 14  
 15  
 16  
 17  
 18  
 19  
 20  
 21  
 22  
 23  
 24  
 25  
 26  
 27

1  
2

### 3 **Online Methods**

#### 4 **Protein half-Life Data**

5 Here we use the filtered *in vivo* protein half-life data for *Saccharomyces cerevisiae*, earlier analyzed by  
6 Madan Babu and co-workers<sup>12</sup>. This dataset includes the half-lives of 3273 yeast proteins, originally  
7 measured by Belle et al.<sup>1</sup>. Belle et al.<sup>1</sup> measured protein half-lives by first inhibiting protein synthesis in  
8 exponentially growing yeast cells with the antibiotic cycloheximide and then monitoring the abundance of  
9 each C-terminally TAP-tagged protein in the yeast genome by quantitative Western blotting at three  
10 different time points.

#### 11 **Protein structure data**

12 On 19<sup>th</sup> April 2017, we downloaded 2853 yeast protein X-ray crystallographic structures from Protein  
13 Data Bank<sup>44</sup>. Structures included in this dataset comprise only the annotated *Saccharomyces cerevisiae*  
14 proteins, obtained from the *Saccharomyces* Genome Database<sup>45</sup>. This initial dataset is further filtered  
15 based on two criteria: (i) the X-ray resolution is  $\leq 3.0$  Å and (ii) at least 75% of the primary chain is  
16 present in the electron density map, (iii) for multiple structures of the same protein, satisfying both the  
17 above criteria, we chose the highest-resolution structure. This filtering leaves us with only 267 crystal  
18 structures with  $\leq 3.0$  Å resolution. This dataset is too small, compared to the proteome-level half-life data  
19 of 3273 yeast proteins. Hence a reliable proteome-wide tendency cannot be expected to be derived by  
20 analyzing these 267 proteins only. Therefore, we also downloaded 5847 modeled yeast proteins from  
21 ModBase<sup>46</sup>. ModBase is a database of comparative protein structure models, calculated by a standardized  
22 automated comparative protein structure modeling pipeline<sup>46</sup>. In this pipeline, a structure model of the  
23 protein of interest is built based on one or more template structures having a certain degree of sequence  
24 identity with the protein of interest. A model is considered to be reliable (have a reliable fold assignment)  
25 if it is evaluated within the following thresholds by at least one of these model evaluation criteria<sup>46</sup>: (i)  
26 MPQS (ModPipe Quality Score)  $\geq 1.1$ , (ii) TSVMOD NO35 (estimated native overlap at 3.5 Å)  $\geq 40\%$ ,  
27 (iii) GA341 (concerns the correct 3D coordinate assignments of the C $\alpha$  atoms)  $\geq 0.7$ , (iv) E-value  
28 (significance of the alignment between the target and the template by PSI-BLAST<sup>47</sup>)  $< 0.0001$ , and (v)  
29 zDOPE  $< 0$  (for understanding the theoretical development of these parameters, please refer to ref. 46).  
30 We include a model structure in our structure dataset based on the following criteria: (i) the modeled  
31 region covers  $\geq 75\%$  of the protein length, (ii) MPQS (ModPipe Quality Score)  $\geq 1.1$ , (iii) TSVMOD  
32 NO35 (estimated native overlap at 3.5 Å)  $\geq 40\%$ , (iv) GA341  $\geq 0.9$ , (v) PSI-BLAST E-value between  
33 model and template structures is  $< 10^{-8}$ , and (vi) zDOPE  $< 0$ . After applying these constraints, we are left  
34 with reliable model structures of 1003 proteins.

#### 35 **Protein intrinsic disorder data**

36 We have used the intrinsic disorder data of 3273 yeast proteins (those with available half-life data), earlier  
37 predicted by Madan Babu and co-workers<sup>12</sup>. The authors used three complementary methods<sup>48-50</sup> for  
38 inferring residue-level disorder tendency of each yeast protein.

#### 39 **Protein mechanical unfolding data**

1 The mechanical unfolding of globular proteins upon pulling the amino acid chain (similar to that occurs  
2 upon proteasome engagement) has been addressed by Atomic Force Microscopy experiments and by  
3 computer simulations. We have used three datasets in our work (Data S1). The first group (G1) includes  
4 16 proteins unfolded in Atomic Force Microscopy experiments, by pulling the polypeptide chains at 600  
5 nm/s (11 proteins) and 300 nm/s (5 proteins) speeds. This dataset is collected from Brockwell et al.<sup>50</sup> and  
6 Sułkowska and Cieplak<sup>51</sup>. The second group (G2) includes 27 proteins unfolded in all-atom computer  
7 simulations. Eleven proteins (G2A) were pulled from the N-terminal at  $5 \times 10^7$  nm/s speed (C-terminal  
8 fixed). This data is also collected from Sułkowska and Cieplak<sup>51</sup>. Sixteen proteins (G2B) were pulled  
9 from N- and C-terminal separately at  $5 \times 10^6$  nm/s speed, keeping the other terminal free, thus allowing the  
10 substrate to rotate and adopt a less obstructive orientation for unfolding (as happens during degradation).  
11 This data is collected from the work of Wojciechowski et al.<sup>52</sup>.

12 In addition, we have collected experimental mechanical unfolding data for three proteins, *Dictyostelium*  
13 *discoideum* filamin<sup>53</sup>, yellow and green fluorescent proteins<sup>54</sup> and Ig27 domain of titin<sup>55</sup>, each depicting  
14 alterations of mechanical resistance upon point-mutations in the native protein. This data is used to verify  
15 whether enhancement/reduction of mechanical resistance in these cases are associated with respective  
16 increase/decrease of contact order.

### 17 **Absolute Contact Order estimation (ACO)**

18 The absolute contact order (ACO) of a protein structure is defined as the average amino acid separation of  
19 3D contacts<sup>56</sup>:

$$20 \quad ACO = \frac{1}{n_c} \sum_{i>j} \Delta(i, j) |s_i - s_j|$$

21 where  $n_c$  is the total number of residue-residue contacts,  $s_i$  and  $s_j$  are the sequence positions of residues  
22  $i$  and  $j$ , and  $\Delta(i, j)$  is the selection criteria that includes  $i$  and  $j$  into analysis only if they are in  
23 contact and if  $|i - j| \geq 4$ . This  $|i - j| \geq 4$  criterion ensures that contacts included in ACO estimation  
24 reflect 3D topology of the proteins, rather than secondary structures. We defined a residue contact  
25 between a pair of residues when the distance between any two atoms from the residue pair is less than the  
26 sum of their van der Waals radii plus 0.5 Å cut-off distance<sup>57</sup>.

### 27 **Accessible and buried surface area calculation**

28 The Surface Racer program<sup>58</sup> is used to calculate the solvent accessible and buried surface areas of the  
29 proteins, with probe radius taken to be 1.4 Å, which resembles the radius of one water molecule. We  
30 calculated the solvent accessible surface area (ASA) of the two interacting partners separately (in their  
31 complexed conformation) and in associated state. If the ASA of the two partners are  $A1$  and  $A2$  and of  
32 their associated structure is  $A3$ , then buried surface area (BSA) is defined as  $(A1+A2-A3)/2$ .

### 33 **Proteome-wide screening for macromolecular complexes**

34 For a proteome-wide screening of yeast macromolecular complexes, we begin with downloading the  
35 previously published dataset of 491 yeast complexes by Gavin et al.<sup>24</sup> and 412 complexes included in the

1 Complex Portal of the IntAct Molecular Interaction Database<sup>25</sup>. The database presented by Gavin et al.<sup>24</sup>  
2 was the first proteome-wide screening for macromolecular machines in yeast, using tandem-affinity-  
3 purification method coupled to mass spectrometry (TAP-MS) to all 6,466 ORFs of *Saccharomyces*  
4 *cerevisiae*. Entries in Complex Portal<sup>25</sup> are based on manual curation of widespread experimental data  
5 depicting direct physical association between complex subunits, such as affinity chromatography,  
6 chromatin immunoprecipitation, coimmunoprecipitation, two hybrid fragment pooling, tandem affinity  
7 purification, electron microscopy and x-ray crystallography. We (i) carefully compare the entries in these  
8 two databases, (ii) further curate the information therein (regarding the existence of the complex and its  
9 subunit composition) based on extensive protein-by-protein literature search of published experimental  
10 data and (iii) add new complexes in the set (along with subunit composition information) accordingly. We  
11 particularly look for reports concerning (i) different isoforms of a given complex and (ii) its temporary  
12 attached particles, such as chaperons and assembly co-factors. Homology-based predicted complexes are  
13 disregarded and only experimentally verified complexes are considered. We finally identify 80  
14 homomeric and 805 heteromeric complexes. **Data S2** includes the association information of different  
15 proteins with different macromolecular complexes along with literature reference.

16 Using this data, first for any given complex, we classify the subunits into two groups: (i) functional  
17 subunits present in the matured complex (if different isoforms exist they are present in most of the  
18 isoforms) are called central, the remaining (ii) temporary attached proteins such as assembly cofactors  
19 and subunits present only in some of the isoforms of a complex are called attached particles.

20 In addition to subunit composition, we further look for literature evidence concerning self-assembly of  
21 macromolecular complexes. By an extensive literature search we collect the assembly hierarchy of 35  
22 yeast complexes (Data S3) indispensable to central cellular processes such as replication, transcription,  
23 translation, cell cycle and transport.

## 24 Yeast paralogue data

25 Yeast paralog pairs were obtained from the work of van der Lee et al.<sup>12</sup>; authors generated the paralogue  
26 set by an all-against-all sequence comparison using BLASTClust<sup>47</sup>. They added more divergent paralogs  
27 from the yeast whole-genome duplication event<sup>61</sup>.

## 28 Statistical Analysis

29 All the statistical analyses are performed using in-house Python scripts and PAST software package<sup>62</sup>.

## 30 References

- 31 44. Berman, H., Henrick, K., Nakamura, H. and Markley, J.L. The worldwide Protein Data Bank (wwPDB): ensuring a  
32 single, uniform archive of PDB data. *Nucleic Acids Res* 35(suppl\_1), D301-D303 (2006).
- 33 45. Issel-Tarver, L., et al. *Saccharomyces* genome database. *Methods Enzymol* 350, 329-346 (2002).
- 34 46. Pieper, U., et al. MODBASE: a database of annotated comparative protein structure models and associated resources.  
35 *Nucleic Acids Res* 34(suppl\_1), D291-D295 (2006).
- 36 47. Altschul, S.F., et al. Gapped BLAST and PSI-BLAST: a new generation of protein database search programs. *Nucleic*  
37 *Acids Res* 25, 3389-3402 (1997).
- 38 48. Obradovic, Z., Peng, K., Vucetic, S., Radivojac, P. and Dunker, A.K. Exploiting heterogeneous sequence properties  
39 improves prediction of protein disorder. *Proteins* 61, 176-182 (2005).
- 40 49. Ward, J.J., Sodhi, J.S., McGuffin, L.J., Buxton, B.F. and Jones, D.T. Prediction and functional analysis of native  
41 disorder in proteins from the three kingdoms of life. *J Mol Biol* 337, 635-645 (2004).



- 1 50. Brockwell, D.J., et al. Mechanically unfolding the small, topologically simple protein L. *Biophys J* 89, 506-519 (2005).
- 2 51. Sułkowska, J.I. & Cieplak, M. Mechanical stretching of proteins—a theoretical survey of the Protein Data Bank. *J.*
- 3 *Phys.: Condens. Matter* 19, 283201 (2007).
- 4 52. Wojciechowski, M., Szymczak, P., Carrión-Vázquez, M. and Cieplak, M. Protein unfolding by biological unfoldases:
- 5 Insights from modeling. *Biophys J* 107, 1661-1668 (2014).
- 6 53. Schwaiger, I., Kardinal, A., Schleicher, M., Noegel, A.A. & Rief, M. A mechanical unfolding intermediate in an actin-
- 7 crosslinking protein. *Nat Struct Mol Biol.* 11, 81-85 (2004).
- 8 54. Perez-Jimenez, R., Garcia-Manyes, S., Ainaravapu, S.R.K. & Fernandez, J.M. Mechanical unfolding pathways of the
- 9 enhanced yellow fluorescent protein revealed by single molecule force spectroscopy. *J Biol Chem.* 281, 40010-40014
- 10 (2006).
- 11 55. Li, H., Carrion-Vazquez, M., Oberhauser, A.F., Marszalek, P.E. and Fernandez, J.M. Point mutations alter the
- 12 mechanical stability of immunoglobulin modules. *Nat Struct Biol.* 7, 1117-1120 (2000).
- 13 56. Grantcharova, V., Alm, E.J., Baker, D. and Horwich, A.L. Mechanisms of protein folding. *Curr Opin Struct Biol* 11,
- 14 70-82 (2001).
- 15 57. Venkatakrisnan, A.J., et al. Diverse activation pathways in class A GPCRs converge near the G-protein-coupling
- 16 region. *Nature* 536, 484-487 (2016).
- 17 58. Tsodikov, O.V., Record, M.T. and Sergeev, Y.V. Novel computer program for fast exact calculation of accessible and
- 18 molecular surface areas and average surface curvature. *J Comput Chem* 23, 600-609 (2002).
- 19 59. Gavin, A.C., et al. Proteome survey reveals modularity of the yeast cell machinery. *Nature* 440, 631-636 (2006).
- 20 60. Orchard, S., et al. The MIntAct project—IntAct as a common curation platform for 11 molecular interaction databases.
- 21 *Nucleic Acids Res.* 42, D358-D363 (2013).
- 22 61. Wolfe, K.H. & Shields, D.C. Molecular evidence for an ancient duplication of the entire yeast genome. *Nature*, 387,
- 23 708–713 (1997).
- 24 62. Hammer, Ř., Harper, D.A.T. & Ryan, P.D. PAST: Paleontological Statistics Software Package for Education and Data
- 25 Analysis. *Palaeontol. Electron.* 4, 9 (2001).

26

27

28

29

30

31

32

33

34

35

36

37

38

39

40

41

## Data S1

1  
2 **Group G1.** Dataset of proteins unfolded in Atomic Force Microscopy experiments. The Protein Data  
3 Bank (PDB) code is listed if the corresponding structure of the protein is available in PDB.  $F_{\max}$  represent  
4 the peak unfolding force required to unwind the corresponding protein,  $v_p$  is the chain pulling speed.  
5 Literature reference for each protein is provided.

| Protein                                | PDB  | $F_{\max}$ (pN) | $v_p$ (nm/s) | Reference |
|----------------------------------------|------|-----------------|--------------|-----------|
| $\alpha$ -spectrin                     | 1U4Q | 30              | 300          | 1, 2      |
| $\alpha$ -spectrin R16                 | 1AJ3 | 54              | 300          | 3         |
| $\alpha$ -spectrin13-18, 18-21         | 1U4Q | 26              | 300          | 1, 2, 4   |
| $\beta$ -spectrin1-4                   | 1S35 | 27              | 300          | 1, 2, 5   |
| $\alpha$ -actin1-4                     | 1HCI | 38              | 300          | 2, 4      |
| lipoyl domain of aceF                  | 2K7V | 15              | 600          | 6         |
| C2A                                    | 1DQV | 60              | 600          | 7         |
| T4 lysozyme                            | 1B6I | 64              | 600          | 8         |
| <sup>10</sup> FNIII                    | 1FNF | 74              | 600          | 9, 10     |
| Calmodulin                             | 1CFC | 80              | 600          | 7         |
| <sup>13</sup> FNIII <sub>27</sub>      | 1FNH | 89              | 600          | 10        |
| TNFN                                   | 1TEN | 113             | 600          | 11        |
| <sup>1</sup> FNIII <sub>27</sub>       | 1OWW | 120             | 600          | 10        |
| <sup>12</sup> FNIII <sub>13FNIII</sub> | 1FNH | 124             | 600          | 10        |
| I27                                    | 1TIT | 127             | 600          | 12        |
| FNIII                                  | 2N1K | 220             | 600          | 10        |

6

## 7 References

- 8  
9  
10  
11  
12  
13  
14  
15  
16  
17  
18  
19  
20  
21  
22  
23  
24  
25  
26  
27  
28  
29  
30  
31  
32  
33  
34  
35
1. Law, R., Carl, P., Harper, S., Dalhaimer, P., Speicher, D.W. and Discher, D.E., 2003. Cooperativity in forced unfolding of tandem spectrin repeats. *Biophysical journal*, 84(1), pp.533-544.
  2. Rief, M., Pascual, J., Saraste, M. and Gaub, H.E., 1999. Single molecule force spectroscopy of spectrin repeats: low unfolding forces in helix bundles. *Journal of molecular biology*, 286(2), pp.553-561.
  3. Lenne, P.F., Raae, A.J., Altmann, S.M., Saraste, M. and Hörber, J.K.H., 2000. States and transitions during forced unfolding of a single spectrin repeat. *FEBS letters*, 476(3), pp.124-128.
  4. Law, R., Harper, S., Speicher, D.W. and Discher, D.E., 2004. Influence of lateral association on forced unfolding of antiparallel spectrin heterodimers. *Journal of Biological Chemistry*, 279(16), pp.16410-16416.
  5. Law, R., Liao, G., Harper, S., Yang, G., Speicher, D.W. and Discher, D.E., 2003. Pathway shifts and thermal softening in temperature-coupled forced unfolding of spectrin domains. *Biophysical journal*, 85(5), pp.3286-3293.
  6. Brockwell, D.J., Paci, E., Zinober, R.C., Beddard, G.S., Olmsted, P.D., Smith, D.A., Perham, R.N. and Radford, S.E., 2003. Pulling geometry defines the mechanical resistance of a [beta]-sheet protein. *Nature Structural & Molecular Biology*, 10(9), p.731.
  7. Carrion-Vazquez, M., Oberhauser, A.F., Fisher, T.E., Marszalek, P.E., Li, H. and Fernandez, J.M., 2000. Mechanical design of proteins studied by single-molecule force spectroscopy and protein engineering. *Progress in biophysics and molecular biology*, 74(1), pp.63-91.
  8. Yang, G., Cecconi, C., Baase, W.A., Vetter, I.R., Breyer, W.A., Haack, J.A., Matthews, B.W., Dahlquist, F.W. and Bustamante, C., 2000. Solid-state synthesis and mechanical unfolding of polymers of T4 lysozyme. *Proceedings of the National Academy of Sciences*, 97(1), pp.139-144.
  9. Li, L., Huang, H.H.L., Badilla, C.L. and Fernandez, J.M., 2005. Mechanical unfolding intermediates observed by single-molecule force spectroscopy in a fibronectin type III module. *Journal of molecular biology*, 345(4), pp.817-826.
  10. Oberhauser, A.F., Badilla-Fernandez, C., Carrion-Vazquez, M. and Fernandez, J.M., 2002. The mechanical hierarchies of fibronectin observed with single-molecule AFM. *Journal of molecular biology*, 319(2), pp.433-447.
  11. Rief, M., Gautel, M., Schemmel, A. and Gaub, H.E., 1998. The mechanical stability of immunoglobulin and fibronectin III domains in the muscle protein titin measured by atomic force microscopy. *Biophysical journal*, 75(6), pp.3008-3014.
  12. Li, H. and Fernandez, J.M., 2003. Mechanical design of the first proximal Ig domain of human cardiac titin revealed by single molecule force spectroscopy. *Journal of molecular biology*, 334(1), pp.75-86.

1 **Group G2A.** Dataset of proteins unfolded in Computer simulations by pulling the N-terminal, while  
2 keeping the other terminal fixed. The Protein Data Bank (PDB) code is listed if the corresponding  
3 structure of the protein is available in PDB.  $F_{\max}$  represent the peak unfolding force required to unwind  
4 the corresponding protein,  $v_p$  is the chain pulling speed. Literature reference for each protein is provided.

| Protein             | PDB  | $F_{\max}$ (pN) | $v_p$ (nm/s)    | Reference |
|---------------------|------|-----------------|-----------------|-----------|
| I1 oxidized         | 1GCG | 2397            | $5 \times 10^7$ | 1         |
| I1 reduced          | 1GCG | 2090            | $5 \times 10^7$ | 1         |
| I27                 | 1TIT | 2479            | $5 \times 10^7$ | 2         |
| I27                 | 1TIT | 2040            | $5 \times 10^7$ | 2, 3      |
| <sup>7</sup> FNIII  | 1FNF | 1638            | $5 \times 10^7$ | 4, 5      |
| <sup>10</sup> FNIII | 1FNF | 1580            | $5 \times 10^7$ | 4, 5, 6   |
| Bovine              | 1V9E | 3000            | $5 \times 10^7$ | 7         |
| Cad1                | 1EDH | 1850            | $5 \times 10^7$ | 5         |
| Cad2                | 1EDH | 1970            | $5 \times 10^7$ | 5         |
| Cell adhesion VCAM1 | 1VSC | 2050            | $5 \times 10^7$ | 5         |
| Cell adhesion VCAM2 | 1VSC | 1620            | $5 \times 10^7$ | 5         |

5

## 6 **References**

- 7
- 8
- 9
- 10
- 11
- 12
- 13
- 14
- 15
- 16
- 17
- 18
- 19
- 20
1. Gao, M., Wilmanns, M. and Schulten, K., 2002. Steered molecular dynamics studies of titin I1 domain unfolding. *Biophysical journal*, 83(6), pp.3435-3445.
  2. Chyan, C.L., Lin, F.C., Peng, H., Yuan, J.M., Chang, C.H., Lin, S.H. and Yang, G., 2004. Reversible mechanical unfolding of single ubiquitin molecules. *Biophysical journal*, 87(6), pp.3995-4006.
  3. Lu, H., Isralewitz, B., Krammer, A., Vogel, V. and Schulten, K., 1998. Unfolding of titin immunoglobulin domains by steered molecular dynamics simulation. *Biophysical journal*, 75(2), pp.662-671.
  4. Craig, D., Krammer, A., Schulten, K. and Vogel, V., 2001. Comparison of the early stages of forced unfolding for fibronectin type III modules. *Proceedings of the National Academy of Sciences*, 98(10), pp.5590-5595.
  5. Lu, H. and Schulten, K., 1999. Steered molecular dynamics simulations of force-induced protein domain unfolding. *Proteins*, 35(4), pp.453-463.
  6. Klimov, D.K. and Thirumalai, D., 2000. Native topology determines force-induced unfolding pathways in globular proteins. *Proceedings of the National Academy of Sciences*, 97(13), pp.7254-7259.
  7. Baumann, C.G., Bloomfield, V.A., Smith, S.B., Bustamante, C., Wang, M.D. and Block, S.M., 2000. Stretching of single collapsed DNA molecules. *Biophysical journal*, 78(4), pp.1965-1978.

21

22

23

24

25

26

27

28

29

30

1 **Group G2B.** Dataset of proteins unfolded in Computer simulations by pulling N- and C-terminal  
 2 separately, while keeping the other terminal free. The Protein Data Bank (PDB) code is listed if the  
 3 corresponding structure of the protein is available in PDB.  $F_{\max}$  represent the peak unfolding force  
 4 required to unwind the corresponding protein,  $v_p$  is the chain pulling speed. Literature reference for each  
 5 protein is provided.

| Protein                           | PDB  | $F_{\max}$ (N-terminal)<br>(pN) | $F_{\max}$ (C-terminal)<br>(pN) | $v_p$ (nm/s)    | Reference |
|-----------------------------------|------|---------------------------------|---------------------------------|-----------------|-----------|
| Cohesin                           | 1AOH | 495                             | 407                             | $5 \times 10^6$ | 1         |
| Green fluorescent protein         | 1GFL | 253                             | 253                             | $5 \times 10^6$ | 1         |
| Nudix                             | 1VCD | 440                             | 385                             | $5 \times 10^6$ | 1         |
| Cytolysin                         | 1O72 | 286                             | 341                             | $5 \times 10^6$ | 1         |
| Cytolysin                         | 1GWY | 308                             | 341                             | $5 \times 10^6$ | 1         |
| Purine nucleoside phosphorylase   | 1ODI | 352                             | 374                             | $5 \times 10^6$ | 1         |
| Lectin                            | 1Y2X | 319                             | 286                             | $5 \times 10^6$ | 1         |
| Lutheran glycoprotein             | 2PF6 | 297                             | 407                             | $5 \times 10^6$ | 1         |
| Purine nucleosidase phosphorylase | 1OTX | 297                             | 341                             | $5 \times 10^6$ | 1         |
| ADP-ribose pyrophosphatase        | 2DSD | 352                             | 286                             | $5 \times 10^6$ | 1         |
| Purine nucleoside phosphorylase   | 1NW4 | 319                             | 363                             | $5 \times 10^6$ | 1         |
| Dihydrofolate reductase           | 1U71 | 275                             | 253                             | $5 \times 10^6$ | 1         |
| I27 domain of titin               | 1TIT | 264                             | 286                             | $5 \times 10^6$ | 1         |
| Ribonuclease H                    | 1RIL | 363                             | 231                             | $5 \times 10^6$ | 1         |
| Barnase                           | 1BNR | 209                             | 176                             | $5 \times 10^6$ | 1         |

6

## 7 References

- 8 1. Wojciechowski, M., Szymczak, P., Carrión-Vázquez, M. and Cieplak, M., 2014. Protein unfolding by  
 9 biological unfoldases: Insights from modeling. *Biophysical journal*, 107(7), pp.1661-1668.

10

## 11 Proteins with experimental evidence concerning altered mechanical resistance upon point 12 mutations

| Protein variant                                                                      | $F_{\max}$ (pN) | $v_p$ (nm/s) | Reference |
|--------------------------------------------------------------------------------------|-----------------|--------------|-----------|
| Titin (I27)                                                                          | 204             | 600          | 1         |
| Titin (Y9P-I27 mutant)                                                               | 266             | 600          | 1         |
| <i>Dictyostelium discoideum</i> filamin                                              | 73              | 100          | 2         |
| <i>Dictyostelium discoideum</i> filamin<br>((Gly) <sub>5</sub> insertion at pos. 33) | 56              | 100          | 2         |
| Green fluorescent protein (GFP)                                                      | 100             | 400          | 3         |
| Yellow fluorescent protein (YFP)<br>(S65G, V68L, Q69K, S72A, T203Y mutations in GFP) | 200             | 400          | 3         |

13

## 14 References

- 15 1. Kenniston, J.A., Baker, T.A., Fernandez, J.M. and Sauer, R.T., 2003. Linkage between ATP consumption and  
 16 mechanical unfolding during the protein processing reactions of an AAA+ degradation machine. *Cell*, 114(4), pp.511-  
 17 520.  
 18 2. Schwaiger, I., Kardinal, A., Schleicher, M., Noegel, A.A. and Rief, M., 2004. A mechanical unfolding intermediate in  
 19 an actin-crosslinking protein. *Nature structural & molecular biology*, 11(1), 81-85.  
 20 3. Perez-Jimenez, R., Garcia-Manyes, S., Ainarapu, S.R.K. and Fernandez, J.M., 2006. Mechanical unfolding pathways  
 21 of the enhanced yellow fluorescent protein revealed by single molecule force spectroscopy. *Journal of Biological  
 22 Chemistry*, 281(52), pp.40010-40014.

## Data S2 and Data S3

1  
2  
3  
4  
5  
6  
7  
8  
9  
10  
11  
12  
13  
14  
15  
16  
17  
18  
19  
20  
21  
22  
23  
24  
25  
26

Available upon personal request to the authors.



1

## Text S1

### 2 Protein's mechanical resistance correlates with their fraction of disordered residues as well

3 It is a well-established fact that presence of disordered regions is associated with weaker mechanical  
4 resistance of biological proteins and proteasomes exploit this attribute by preferring the disordered  
5 termini of substrate proteins as initiation sites of forced unwinding<sup>1</sup>. Since the percent of disordered  
6 residues (*PDR*) present within a protein can be considered as a measure of their overall stability<sup>2,3</sup>, we aim  
7 to find a quantitative sketch of how *PDR* correlates with protein's mechanical resistance. We estimate the  
8 *PDR* of proteins included in G1, G2A and G2B datasets using DISOPRED3 algorithm<sup>4</sup> and obtain  
9 statistically significant negative correlations with peak unfolding forces.

10 Linear regression for G1 group:

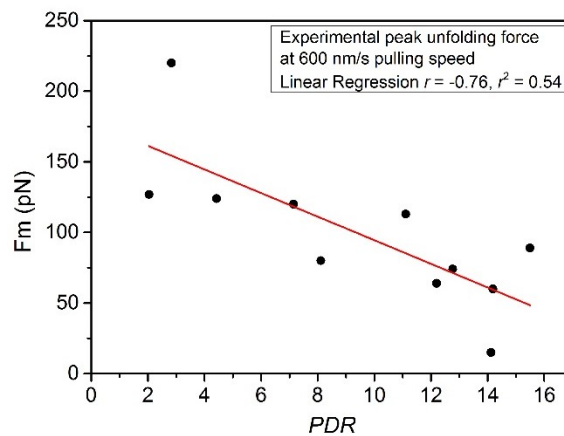

11

12 Linear regression for G2A group:

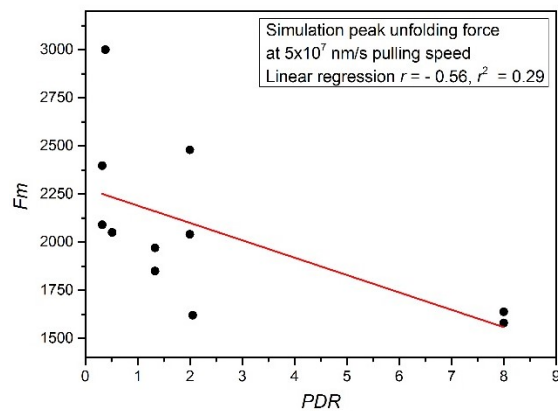

13

14 Linear regression for G2B group:

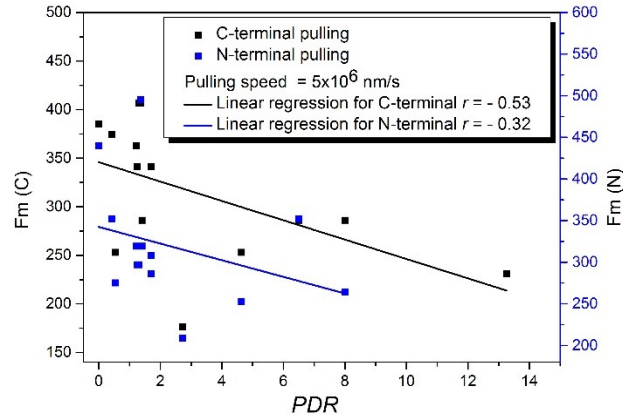

1

2 The correlation between *PDR* and mechanical resistance is basically quantitatively presents the already  
 3 established concept that proteins with higher degree of disorderness would unfold easily. Though this  
 4 issue has been repetitively tested and validated in multiple experiments, a simple mathematical sketch has  
 5 been missing until now.

6 ***ACO*, not *PDR*, is the major determinant of protein’s mechanical resistance**

7 In the main text, we have shown that higher *ACO* is associated with higher mechanical resistance of  
 8 substrate proteins. Here we observe another striking fact that overall degree of disorderness, measured as  
 9 *PDR*, contributes to protein’s mechanical resistance as well.

10 If *ACO* and disorder both determine mechanical resistance, what are their unique contributions (if the  
 11 other is absent) to the correlation with mechanical resistance? We have calculated the partial correlations  
 12 of *ACO* and *PDR* with mechanical resistance to answer this question. If both A and B correlate with C,  
 13 partial correlation between A and C excludes the effect of B to estimate A’s unique contribution.

14 **Results for G1 set (\* signifies correlation *p* value < 0.05)**

| Original Pearson correlations |            |            | Partial correlations |            |            |
|-------------------------------|------------|------------|----------------------|------------|------------|
|                               | <i>ACO</i> | <i>PDR</i> |                      | <i>ACO</i> | <i>PDR</i> |
| <i>ACO</i>                    |            |            | <i>ACO</i>           |            |            |
| <i>PDR</i>                    | -0.40      |            | <i>PDR</i>           | -0.12      |            |
| <i>Fm</i>                     | 0.95*      | -0.76*     | <i>Fm</i>            | 0.88*      | -0.54*     |

15

16 **Results for G2A set (\* signifies correlation *p* value < 0.05)**

| Original Pearson correlations |            |            | Partial correlations |            |            |
|-------------------------------|------------|------------|----------------------|------------|------------|
|                               | <i>ACO</i> | <i>PDR</i> |                      | <i>ACO</i> | <i>PDR</i> |
| <i>ACO</i>                    |            |            | <i>ACO</i>           |            |            |
| <i>PDR</i>                    | -0.37      |            | <i>PDR</i>           | -0.09      |            |
| <i>Fm</i>                     | 0.74*      | -0.60*     | <i>Fm</i>            | 0.68*      | -0.47      |

17

18

19

1 **Results for G2B set (\* signifies correlation  $p$  value < 0.05)**

| Original Pearson correlations |            |            | Partial correlations |            |            |
|-------------------------------|------------|------------|----------------------|------------|------------|
|                               | <i>ACO</i> | <i>PDR</i> |                      | <i>ACO</i> | <i>PDR</i> |
| <i>ACO</i>                    |            |            | <i>ACO</i>           |            |            |
| <i>PDR</i>                    | -0.53*     |            | <i>PDR</i>           | -0.18      |            |
| <i>Fm</i>                     | 0.89*      | -0.52*     | <i>Fm</i>            | 0.85*      | -0.21      |

2

3 The partial correlation between *ACO* and *PDR* vanishes when we exclude the effect of mechanical  
4 resistance. This proves the correlation between *ACO* and *PDR* is merely an indirect correlation. The  
5 fascinating observation is that, even after excluding the effect of *PDR*, there is only a little reduction of  
6 the correlation between mechanical resistance and *ACO*. Conversely, if we exclude the effect of *ACO*, the  
7 correlation between mechanical resistance and *PDR* drops severely. This clearly dictates that at least for  
8 small globular proteins *ACO* is the major deterministic factor of mechanical resistance, while *PDR* has a  
9 minor effect. This result may be a result of the fact that proteins included in these datasets are all globular  
10 proteins with a few disordered residues at their termini. Disorder may play much stronger roles in proteins  
11 with longer disordered segments.

12

13

14 **Complex subunits, that remain structured in monomeric state, depict stronger correlations**  
15 **between *ACO* and half-life**

16 Gunasekaran et al.<sup>5</sup> showed that a simple plot (Nussinov plot) of length-normalized Buried Surface Area  
17 (*BSA/L*) versus length-normalized Accessible Surface Area (*ASA/L*) of complex subunits (at complexed  
18 state) can tell us whether a subunit of interest remains unstructured or structured at monomeric state. We  
19 exploit this concept to infer the disorder/order status of complex subunits with resolved crystal structures  
20 at monomeric state (see Online Methods).

21

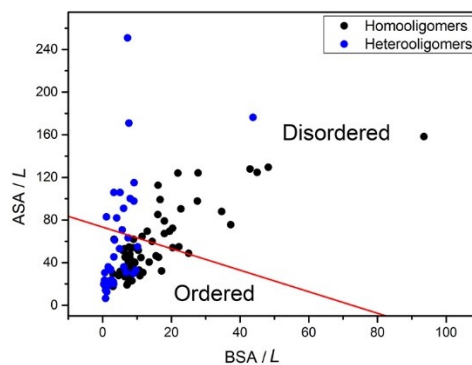

22 Using this plot, we estimate the correlations between half-life and absolute contact order (*ACO*) for  
23 subunits (i) those that remain unstructured and (ii) structured in monomeric state.

24 Linear regressions for homo- and heteromeric subunits that remain disordered in monomeric state:

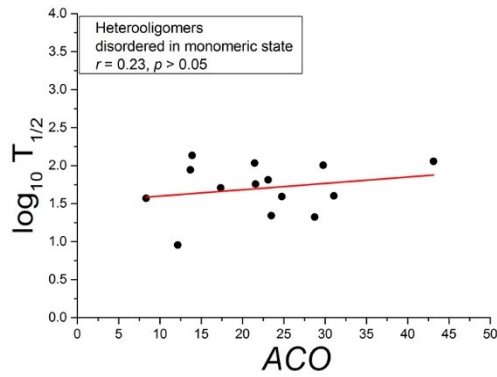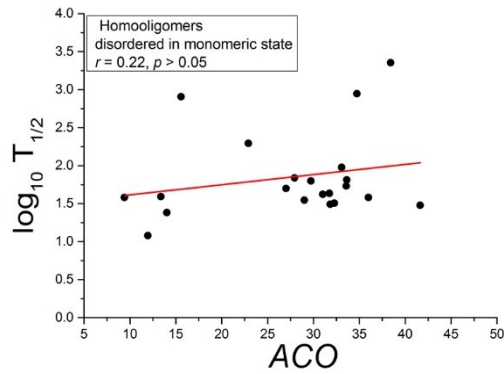

- 1
- 2 Linear regressions for homo- and heteromeric subunits that remain structured in monomeric state:

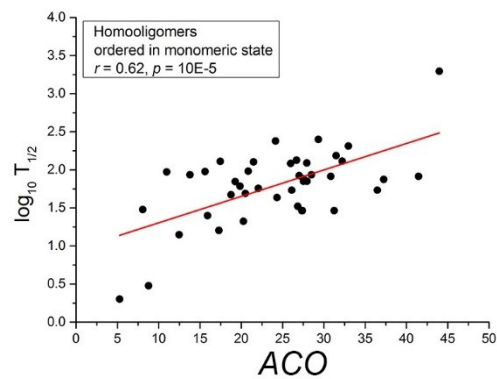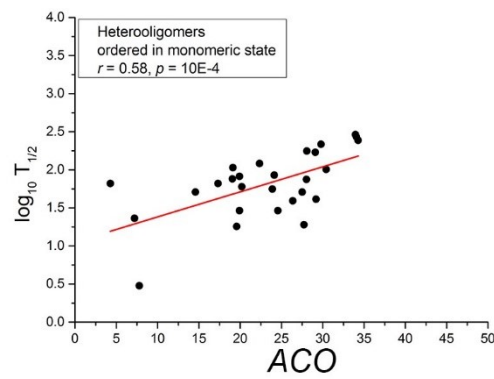

- 3
- 4 Nussinov plot leads us to some very interesting conclusions. First,  $ACO$  is a much stronger regulator of
- 5 half-life for oligomeric proteins that remain structured in monomeric states as well, compared to those
- 6 that remain disordered at monomeric state. It is a well-known fact that oligomeric proteins degrade much
- 7 faster in monomeric state. So, for proteins that remain structured prior to degradation,  $ACO$  stands as a
- 8 marker of mechanical resistance and thus affects half-life. For proteins, that become unstructured at
- 9 monomeric state, one cannot expect a correlation between complexed state  $ACO$  and half-life.

10

11 **Stronger correlations between BSA and half-life is obtained for complex subunits that remain**

12 **structured in monomeric state, compared to those that remain disordered**

13 In the main text, we have shown that  $BSA$  acts as a marker of dissociation rate of complex subunits.

14 Because oligomeric proteins degrade much faster in monomeric state, proteins that dissociate slowly from

15 complexes, have longer half-life. We now ask whether this relationship depends on the fact that some

16 oligomeric proteins remain structured and others remain disordered in monomeric state.

17 Linear regressions between  $BSA$  and half-life for homo- and heteromeric complex subunits that remain

18 disordered in monomeric state:

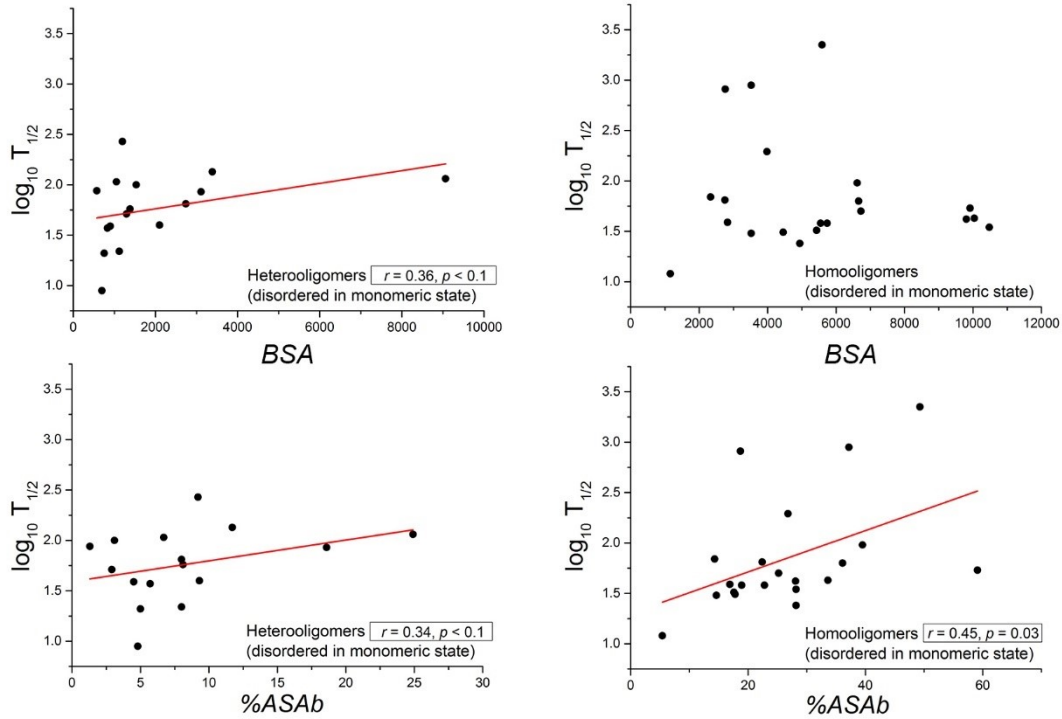

1

2

3

4

5

6

7

8

9

10

11

12 Linear regressions between *BSA* and half-life for homo- and heteromeric complex subunits that remain  
13 structured in monomeric state:



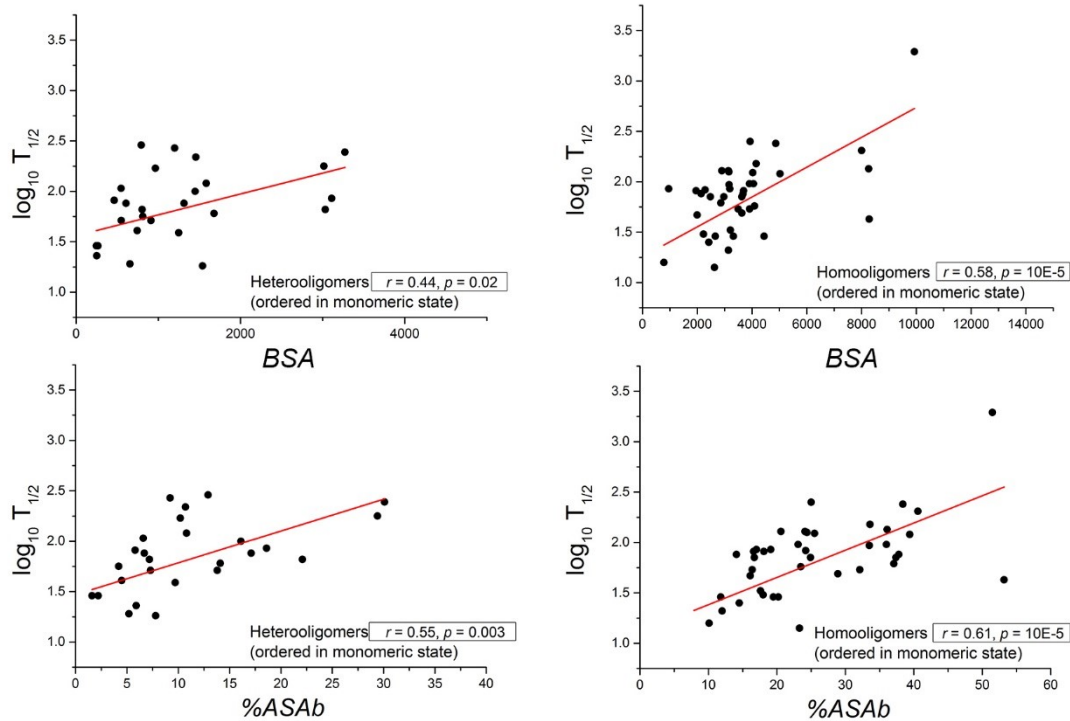

1

2 Nussinov plot again leads us to some very interesting conclusions. Proteins that obtain stable 3D structure  
3 only after binding depict weaker dependency with *BSA*. Just as we noticed in the main text, the  
4 correlation gets improved when we consider percent of ASA buried (%*ASAb*) instead of *BSA*. It has been  
5 previously shown that proteins with higher disorderness can even get degraded directly from complexes,  
6 if proteasomes can access their segments that remain disordered even in complexed state. This probability  
7 of proteasomal engagement is expected to be much weaker for proteins that are remain ordered even in  
8 monomeric state, explaining the *BSA* dependency.

9

10

## 11 References

- 12 1. Berko, D., et al. The direction of protein entry into the proteasome determines the variety of products and depends on  
13 the force needed to unfold its two termini. *Mol. Cell* 48, 601-611 (2012).
- 14 2. Marsh, J.A. & Teichmann, S.A. Protein flexibility facilitates quaternary structure assembly and evolution. *PLoS Biol.*  
15 12, e1001870 (2014).
- 16 3. van der Lee, R. et al. Intrinsically disordered segments affect protein half-life in the cell and during evolution. *Cell Rep.*  
17 8, 1832-1844 (2014).
- 18 4. Jones, D.T. & Cozzetto, D. DISOPRED3: precise disordered region predictions with annotated protein-binding activity.  
19 *Bioinformatics*, 31, 857-863 (2014).

20
